# Supplementary material for: Self-Assembled Monolayers of Copper Sulfide Nanoparticles on Glass as Antibacterial Coatings
Source: PubMed Central journal article supplement (PMC7075189; doi:10.3390/nano10020352), 2020-02-18
Supplement: nanomaterials-10-00352-s001.pdf [file nanomaterials-10-00352-s001.pdf]

## Supplementary materials

# Self-Assembled Monolayers of Copper Sulfide Nanoparticles on Glass as Antibacterial Coatings

Chiara Gargioni<sup>1</sup>, Mykola Borzenkov<sup>2</sup>, Laura D'Alfonso<sup>2</sup>, Paola Sperandeo<sup>3</sup>, Alessandra Polissi<sup>3</sup>, Lucia Cucca<sup>1</sup>, Giacomo Dacarro<sup>1</sup>, Pietro Grisoli<sup>4</sup>, Piersandro Pallavicini<sup>1</sup>, Agnese D'Agostino<sup>1</sup>, Angelo Taglietti<sup>1\*</sup>

<sup>1</sup> Department of Chemistry, University of Pavia, Viale Taramelli 12, 27100 Pavia, Italy; E-mail: angelo.taglietti@unipv.it

<sup>2</sup> Nanomedicine Center, Department of Physics, University of Milano-Bicocca, piazza dell'Ateneo Nuovo, 20126 Milan, Italy

<sup>3</sup> Department of Pharmacological and Biomolecular Sciences, University of Milan, via Balzaretti 9, 20133 Milan, Italy

<sup>4</sup> Department of Drug Sciences, University of Pavia, Viale Taramelli 14, 27100 Pavia, Italy.

\* Correspondence: angelo.taglietti@unipv.it; Tel.: +39-382-987342

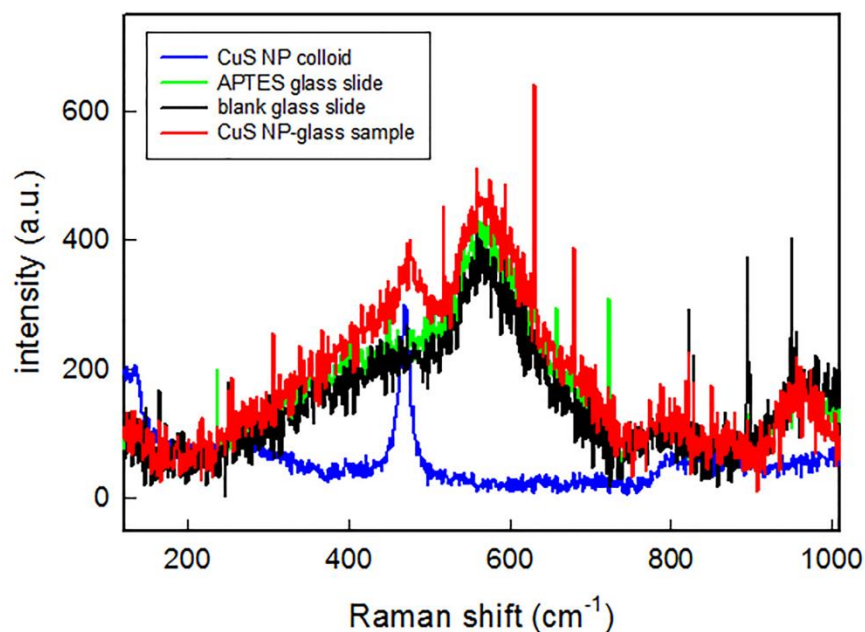

**Figure S1** Raman spectra of a colloidal sample of CuS NP dried on glass (blue line), of a CuS NP-glass sample (red line), of a blank glass slide (black line), of an APTES functionalized glass slide (green line).

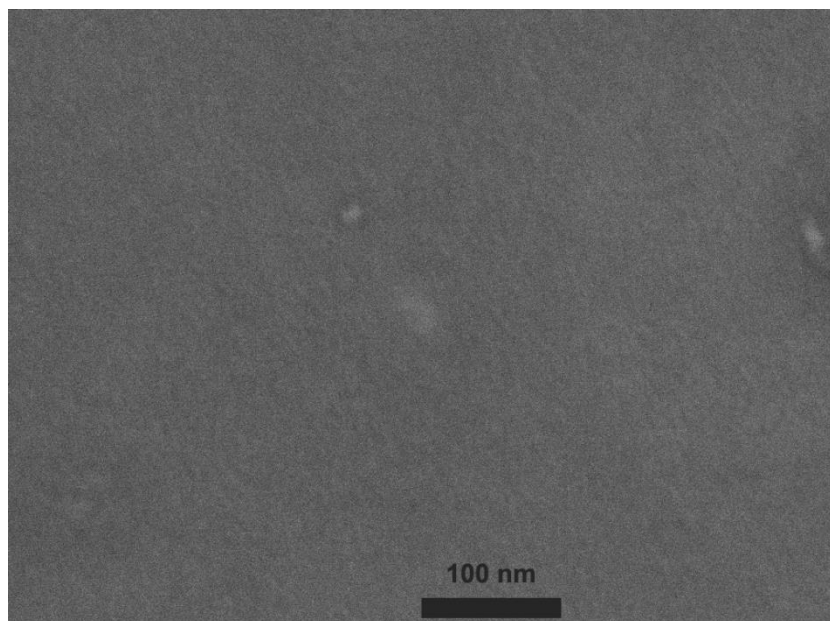

**Figure S2** SEM image of a glass slide functionalized with APTES.

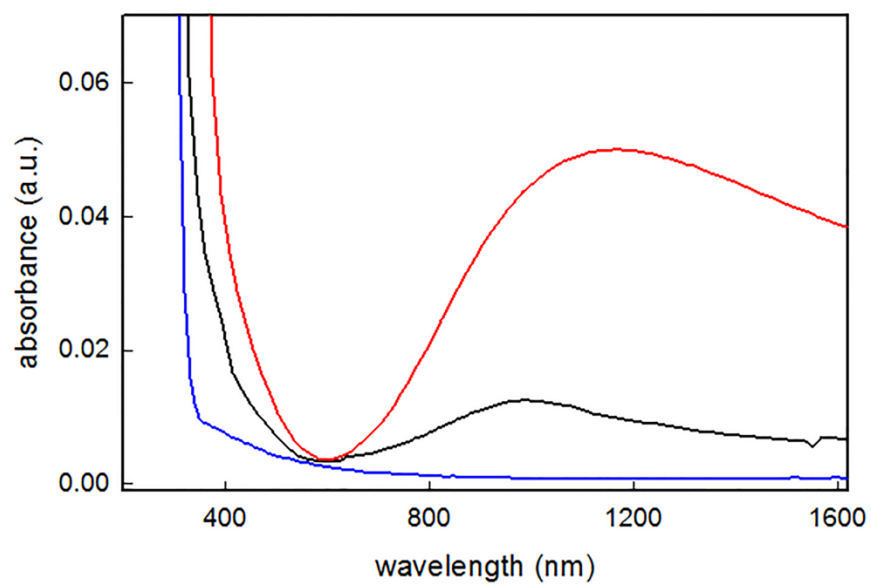

**Figure S3** UV-vis spectrum of a CuS NP-glass sample freshly prepared (red line) compared with the spectrum of a CuS NP-glass sample after one week of immersion in water (black line). The blue line represents the spectrum of a glass slide functionalized with APTES.

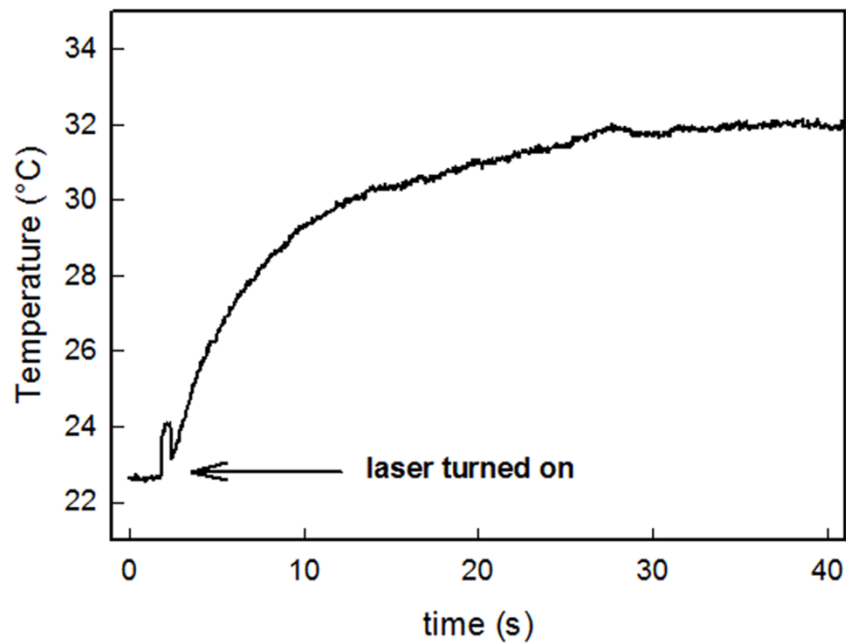

**Figure S4** Temperature increase as a function of irradiation time, measured under NIR laser irradiation at 950 nm, 0.35 W/cm<sup>2</sup> of CuNP-glass sample

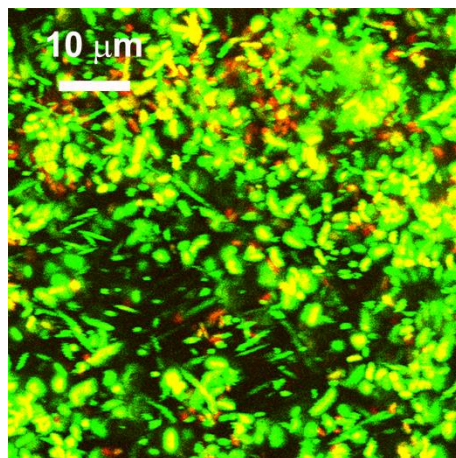

**Figure S5** Representative confocal image of bacteria (*P. aeruginosa*) inoculated on blank sample without irradiation. The overall contact time between bacteria inoculation and image registration was of three hours. Field of view: 64.2x64.2 μm<sup>2</sup>
